# Supplementary material
Source: PubMed Central journal article supplement (PMC1850956)
Supplement: NIHMS18716-supplement-supp.pdf [file NIHMS18716-supplement-supp.pdf]

## Supporting Online Material Tonkin and Bass

### List of Strains:

wild-type, Bristol N2  
*adr-1(gv6);adr-2(gv42)*  
*rde-1(ne219)*  
*rde-1(ne300)*  
*rde-4(ne299)*  
*adr-1(gv6);adr-2(gv42);rde-1(ne219)*  
*adr-1(gv6);adr-2(gv42);rde-1(ne300)*  
*adr-1(gv6);adr-2(gv42);rde-4(ne299)*  
*che-2(e1033)*  
*odr-3(n2150)*  
*che-2(e1033);rde-1(ne219)*  
*odr-3(n2150);rde-1(ne219)*

All crosses were followed by single worm PCR. Smaller than wild-type PCR products were used to follow deletions in the *adr* genes. All *rde*, *che*, and *odr* alleles are point mutations and were followed by gain or loss of a restriction site in PCR products. Direct sequencing of PCR products was used when mutations did not alter a restriction site.

Figure S1

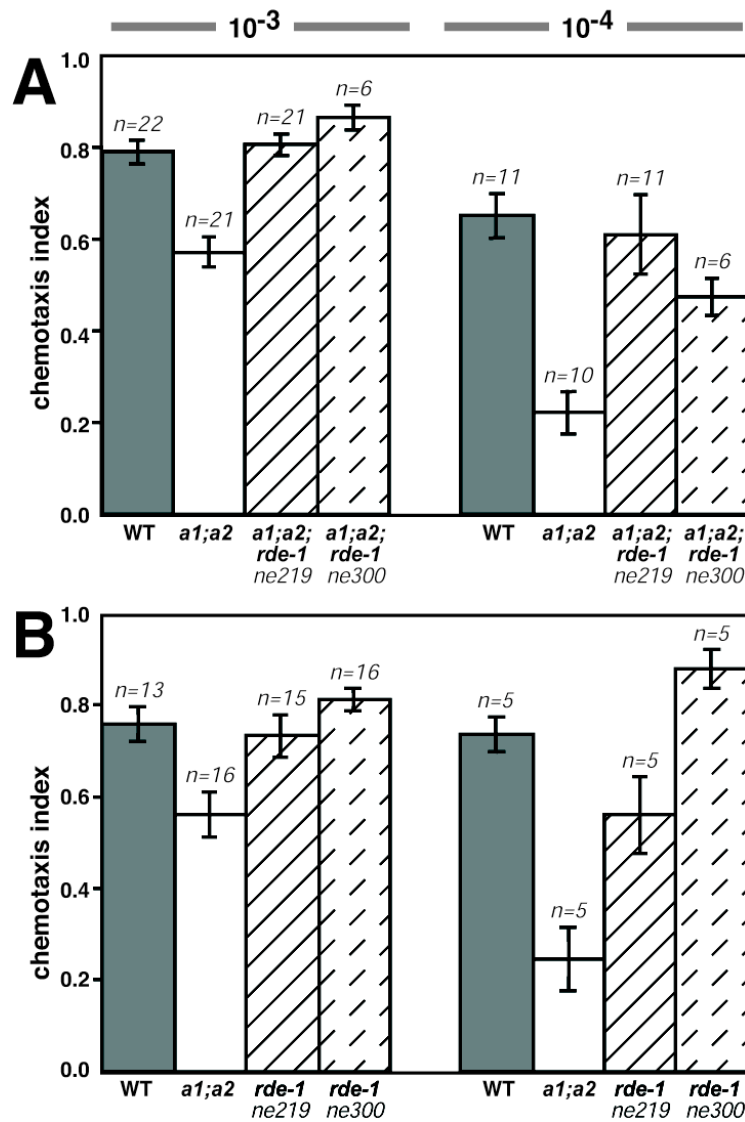

**Figure S1 Legend:**

Graphs show mean chemotaxis indices for assays with diacetyl at  $10^{-3}$  and  $10^{-4}$  dilutions. The number of trials is noted above error bars (S.E.M.). Wildtype (WT) and *adr-1(gv6);adr-2(gv42)* double-mutants (*a1;a2*) were compared with two *rde-1* rescue strains (A), or with *rde-1* strains (B). Values for rescue strains were significantly different ( $P \leq .003$ ) from *a1;a2* strains, but not from WT. *P* values result from a student's t-test (two-tailed, unequal variance).
